# Supplementary material
Source: publisher figshare collection journal article supplement (https://karger.figshare.com/articles/dataset/_/16567518)
Supplement: Supplementary file 1 [file 1]

## Manuscript Analysis Request Form

**Target Date for Submission:** March 2021

**Current Study Status:** Manuscript Development

**Analysis Plan:** ☐ Prior to Study Start-up or Grant ☒ Analysis for Write-up

### DATA SUMMARY AND ANALYSIS PLAN

**Data Storage:**

☐ REDCap ☒ Excel

**Table 1. Univariate analysis of factors associated with diagnostic yield**

|                                                                                                        | Positive biopsy (n = 79 )<br>(Column 16, DIAG, =1) | Negative biopsy (n = 21 )<br>(Column 16, DIAG, =2) | Total (n = 100)                | P-value |
|--------------------------------------------------------------------------------------------------------|----------------------------------------------------|----------------------------------------------------|--------------------------------|---------|
| Navigation technique (Column 2, FNAV)<br><br>S-ENB (=0)<br>F-ENB (=1)                                  | n (%)                                              | n (%)                                              | n (%)                          |         |
| Radial probe ultrasound image (Column 6, USG)<br><br>Concentric (=2)<br>Eccentric (=1)<br>No view (=0) | n (%)                                              | n (%)                                              | n (%)                          |         |
| Size cm, median (IQR)<br>(Column 9, SSIZ)                                                              | Mean (SD), Median (IQR), Range                     | Mean (SD), Median (IQR), Range                     | Mean (SD), Median (IQR), Range |         |
| Lesion size > 2 cm (Column 8, SG2)<br><br>(=1)                                                         | n (%)                                              | n (%)                                              | n (%)                          |         |
| Lesion size ≤ 2cm (Column 7, SL2)<br><br>(=1)                                                          | n (%)                                              | n (%)                                              | n (%)                          |         |
| Lobe (Column 10, LUNL)<br>Right upper lobe (=0)<br>Right middle lobe (=1)<br>Right lower lobe (=3)     | n (%)                                              | n (%)                                              | n (%)                          |         |

|                                                                                                                                                       |       |       |       |  |
|-------------------------------------------------------------------------------------------------------------------------------------------------------|-------|-------|-------|--|
| Left upper lobe (=4)<br>Lingula (=5)<br>Left lower lobe (=6)                                                                                          |       |       |       |  |
| Parenchymal centrality<br><br>Central (Column 12, CEN, =1)<br>Peripheral (Column 13, PER, =1)<br>Peripheral and abutting pleural (Column 11, PAB, =1) | n (%) | n (%) | n (%) |  |
| Air bronchogram (Column 14, ABR)<br>Present (=1)<br>Absent (=0)                                                                                       | n (%) | n (%) | n (%) |  |
| Lesion characteristics (Column 15, LEC)<br>Solid (=0)<br>Semi-solid or ground glass (=1)                                                              | n (%) | n (%) | n (%) |  |
| Catheter choice<br>45° (Column 3, 45D, =1)<br>90° (Column 4, 90D, =1)<br>180° (Column 5, 180D, =1)                                                    | n (%) | n (%) | n (%) |  |

**Table 2. Multivariable logistic regression model**

|                               | Factors                            | OR (positive diagnosis, Column 16, DIAG, =1) | 95% CI |
|-------------------------------|------------------------------------|----------------------------------------------|--------|
| Fluoroscopic navigation       | (Column 2, FNAV, =1)               |                                              |        |
| Radial probe ultrasound image | (Column 6, USG)<br>Concentric (=2) |                                              |        |
